# Supplementary material for: Travel scenario workshops for geographical accessibility modeling of health services: A transdisciplinary evaluation study
Source: Frontiers journal article supplement (doi:10.3389/fpubh.2022.1051522), 2023-01-18
Supplement: Data_Sheet_1.zip [file Supplementary Figures and Tables.PDF › Supplementary Figures and Tables.PDF]

## Supplementary Figures and Tables

### Tables

**Supplementary Table 1** presents an overview of the research activities per applied ILA phase (I-II-III-IV). Implementation (ILA phase V) was outside the scope of this research.

| ILA Phase |    |     |    | Research Activities                                                                                                                                                                                                                                                                                                                                                                                                       | Date         |
|-----------|----|-----|----|---------------------------------------------------------------------------------------------------------------------------------------------------------------------------------------------------------------------------------------------------------------------------------------------------------------------------------------------------------------------------------------------------------------------------|--------------|
| I         | II | III | IV |                                                                                                                                                                                                                                                                                                                                                                                                                           |              |
|           |    |     |    | <ul style="list-style-type: none"> <li>Observing the remote TSW in Timor Leste</li> </ul>                                                                                                                                                                                                                                                                                                                                 | Nov 2020     |
|           |    |     |    | <ul style="list-style-type: none"> <li>Scoping meetings with UNICE staff to affirm the research design and objectives, and establish contacts within UNFPA HQ</li> </ul>                                                                                                                                                                                                                                                  | Jan-Mar 2021 |
|           |    |     |    | <ul style="list-style-type: none"> <li>Reviewing the technical country reports of Sudan and Togo</li> <li>Preparing the combined interviews</li> </ul>                                                                                                                                                                                                                                                                    | Mar 2021     |
|           |    |     |    | <ul style="list-style-type: none"> <li><b>Combined exploratory- and in-depth interviews (N=5)</b> with the UNFPA EmONC program director and 4 UNICE AccessMod experts who together attended TSWs in all 14 countries where the EmONC program was implemented</li> <li>Recruitment of participants for in-depth interviews and FGDs, and finalizing the in-depth interview guide</li> </ul>                                | Mar-Apr 2021 |
|           |    |     |    | <ul style="list-style-type: none"> <li><b>In-depth interviews (N=4)</b> with 2 maternal- and reproductive health experts, 1 GIS expert and 1 health economist who also had cartographic expertise</li> </ul>                                                                                                                                                                                                              | Apr 2021     |
|           |    |     |    | <ul style="list-style-type: none"> <li>Analyzing all individual interviews</li> <li>Integrating the in-depth findings to develop a TSW evaluation survey for past workshop attendees</li> </ul>                                                                                                                                                                                                                           | Apr-May 2021 |
|           |    |     |    | <ul style="list-style-type: none"> <li>Distributing the survey to past workshop attendees via 13<sup>a</sup> UNFPA country offices</li> <li>Recruiting more FGD participants</li> </ul>                                                                                                                                                                                                                                   | May 2021     |
|           |    |     |    | <ul style="list-style-type: none"> <li>By means of the <b>TSW evaluation survey (N=31)</b> consulting cartographic experts, GIS experts, maternal- and reproductive health experts, community health workers, nurses, midwives, regional (health) directors, regional representatives, a road (network) expert, local UNFPA staff, an epidemiologist, a policy development evaluator, and delegates of the MoH</li> </ul> | May-Jun 2021 |

| ILA Phase |    |     |    | Research Activities                                                                                                                                                                                                                                                                                                                                                                                                                                                                                        | Date     |
|-----------|----|-----|----|------------------------------------------------------------------------------------------------------------------------------------------------------------------------------------------------------------------------------------------------------------------------------------------------------------------------------------------------------------------------------------------------------------------------------------------------------------------------------------------------------------|----------|
| I         | II | III | IV |                                                                                                                                                                                                                                                                                                                                                                                                                                                                                                            |          |
|           |    |     |    | <ul style="list-style-type: none"> <li>Analyzing survey responses</li> <li>Integrating the in-depth- and survey findings to prepare the co-creating FGDs</li> <li>Organizing <b>2 co-creating FGDs (N=8)</b> with UNIGE- and a diversity of UNFPA stakeholders</li> <li>Inclusively prioritizing possible TSW improvement strategies and discussing ideas about the formatting of a SOP</li> <li>Analyzing and comparing the perspectives of the FGD participants</li> <li>Developing a TSW SOP</li> </ul> | Jun 2021 |

<sup>a</sup> No survey-distribution request was sent to the UNFPA Country Office in Timor Leste, because the survey was not available in Portuguese.

**Supplementary Table 2.** Weighted Average-Ranking of Stakeholders' Level of Relevant Knowledge to Contribute to the Development of Realistic Travel Scenarios as Recorded in the Evaluation Survey (N=31)

| Assessment of other Stakeholders              | Self-Assessment <sup>a,b</sup>            |
|-----------------------------------------------|-------------------------------------------|
| 1. GIS/cartographic experts                   | 1. GIS/cartographic experts               |
| 2. Maternal/reproductive health experts       | 2. Community nurses/local health workers  |
| 3. Community nurses/local health workers      | 3. Maternal/reproductive health experts   |
| 4. Transportation/road experts                | 4. UNFPA staff                            |
| 5. Midwife/midwifery experts                  | 5. Transportation/road experts            |
| 6. (Delegates of the) MoH                     | 6. Midwife/midwifery experts <sup>c</sup> |
| 7. Medical practitioners/experts <sup>c</sup> | 6. (Delegates of the) MoH <sup>c</sup>    |
| 7. Regional (health) directors <sup>c</sup>   | 7. Regional (health) directors            |
| 9. UNFPA staff                                |                                           |

<sup>a</sup> Only displaying the options as they were given in the question regarding the relevant knowledge assessment of others.

<sup>b</sup> No medical practitioners filled out the survey.

<sup>c</sup> Identical weighted averages resulted in a shared rank.

**Supplementary Table 3.** Indication of Who Helped the Survey Respondents to Understand the Meaning and Relevance of the Main TSW Concepts (N=31)

| TSW concepts           | Stakeholders who helped with understanding (%) |                               |                     |                |
|------------------------|------------------------------------------------|-------------------------------|---------------------|----------------|
|                        | TSW facilitator(s)                             | GIS/road/cartographic experts | Other TSW attendees | Not applicable |
| Types of roads         | 29.0%                                          | 48.4%                         | 0%                  | 22.6%          |
| Road conditions        | 25.8%                                          | 51.6%                         | 0%                  | 22.6%          |
| Land cover             | 32.3%                                          | 35.5%                         | 0%                  | 32.3%          |
| Modes of transport     | 41.9%                                          | 29.0%                         | 0%                  | 29.0%          |
| Movement barriers      | 45.2%                                          | 35.5%                         | 0%                  | 19.4%          |
| Travel time            | 54.8%                                          | 32.3%                         | 0%                  | 12.9%          |
| Travel speed           | 61.3%                                          | 16.1%                         | 3.2%                | 19.4%          |
| Referral time          | 67.7%                                          | 22.6%                         | 0%                  | 9.7%           |
| Catchment area(s)      | 51.6%                                          | 29.0%                         | 3.2%                | 16.1%          |
| Accessibility coverage | 51.6%                                          | 29.0%                         | 3.2%                | 16.1%          |

## Figures

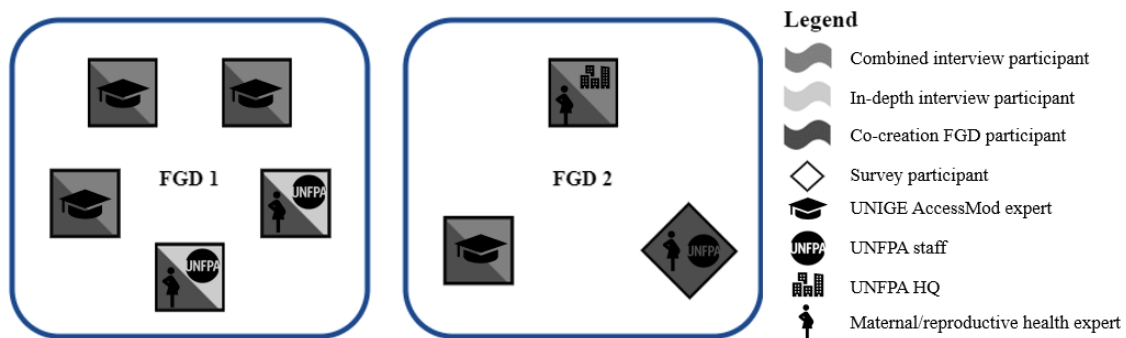

**Supplementary Figure 1.** Overview of Participants per Co-Creating FGD

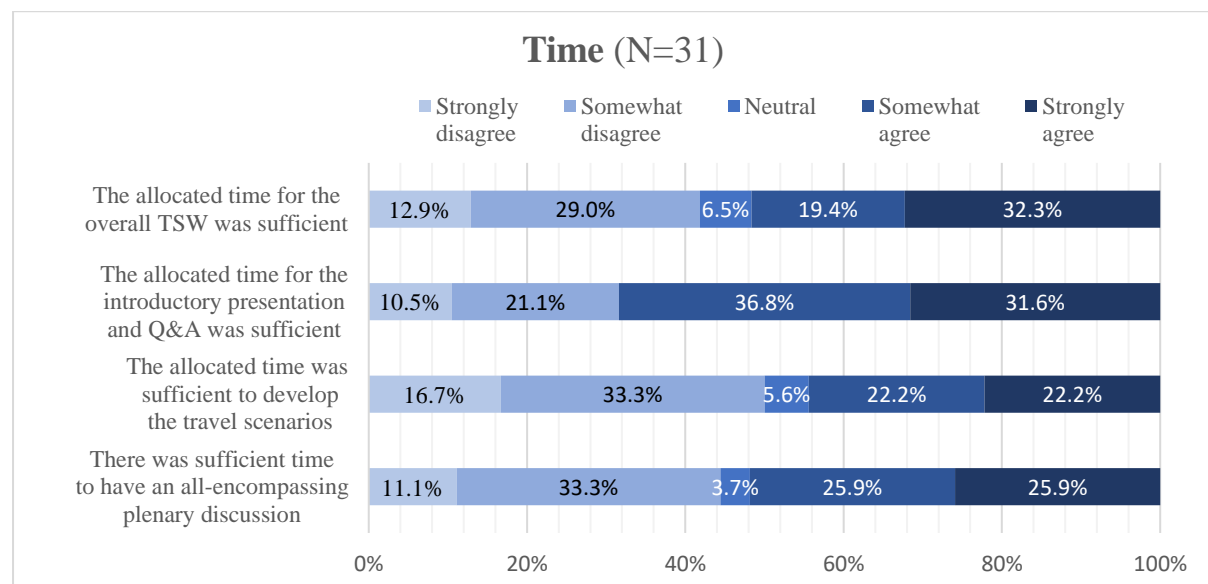

**Supplementary Figure 2.** Stacked Bar Graph Showing the Survey Responses in Relation to the Identified Time-Challenge

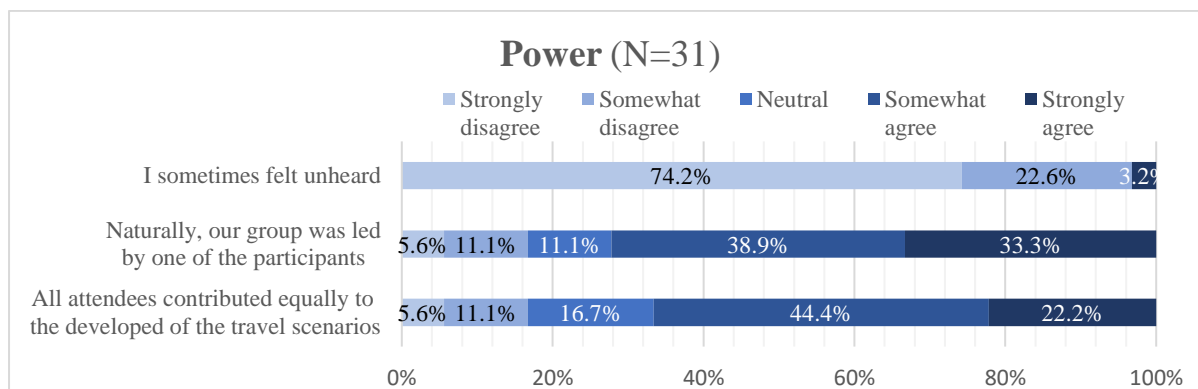

**Supplementary Figure 3.** Stacked Bar Graph Showing the Survey Responses in Relation to the Identified Power-Challenge

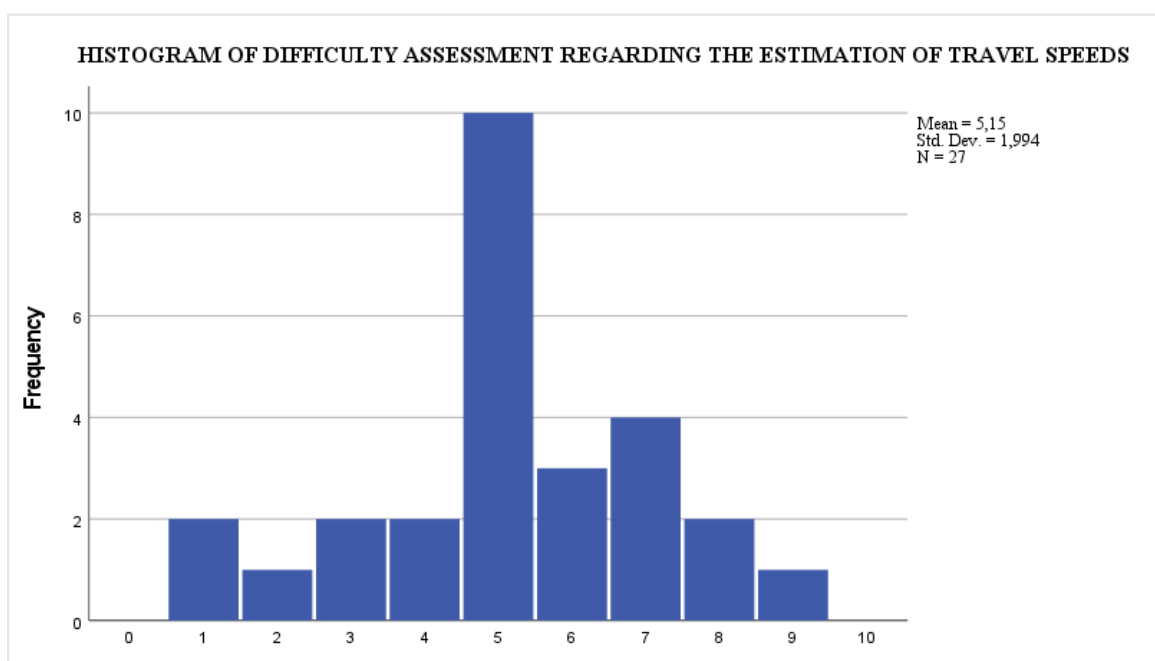

**Supplementary Figure 4.** Results of the Evaluation Survey's Difficulty Assessment Regarding the Estimation of Travel Speeds

## STANDARD OPERATING PROCEDURE

for Knowledge Elicitation Travel Scenario Workshops  
in the context of Geographic Accessibility Modeling

### Prior to the Travel Scenario Workshop

#### Overall Organization

- ✓ **Communicate a clear overview of the desired national and local experts to the MoH and UNFPA country office, and stress the importance of their attendance (considering variety and number)**
- ✓ Develop detailed basic maps of the concerned country/region
- ✓ Develop a predefined travel scenario tailored to the applicable context

#### Inclusive Preparation

- ✓ **Involve GIS, cartographic, and road experts (and, if applicable, local facilitators) in the preparation of the TSW**
- ✓ Develop the attendee-preparation materials together with the above mentioned experts
- ✓ **Require the invited attendees to prepare themselves for the TSW with the supplied materials**

### During the Travel Scenario Workshop

#### Introduction

- ✓ Elaborate and/or illustrate the concept of travel speed more, for example with the help of visualizations, travel times, referral times, or GPS data

#### Group work

- ✓ **Create clusters based on similar regional characteristics or by dividing experts from 1 region in 2 groups**
- ✓ Make sure the facilitator has access to a predefined travel scenario

#### Plenary Discussion

- ✓ **Allow room for cross-validation considering the developed travel scenarios between the created clusters**

### After the Travel Scenario Workshop

#### Immediately

- ✓ **Distribute the TSW evaluation survey among the attendees**

#### As Soon As Possible

- ✓ Verify/discuss the developed accessibility models with the workshop attendees (for example the day(s) after the TSW while the attendees are involved with other EmONC program activities)
- ✓ Analyse the survey results and preferably discuss these inclusively

Supplementary Figure 5. Initial SOP
