# Supplementary material for: Travel scenario workshops for geographical accessibility modeling of health services: A transdisciplinary evaluation study
Source: Frontiers journal article supplement (doi:10.3389/fpubh.2022.1051522), 2023-01-18
Supplement: Data_Sheet_1.zip [file Supplementary Information 4.PDF › Supplementary Information 4.PDF]

## Initial Codebook

| Code group    | Code              | Definition                                                                                                    |
|---------------|-------------------|---------------------------------------------------------------------------------------------------------------|
| Process       | Countries         | In what counties one was involved in the process.                                                             |
|               | Experience        | How one experiences the whole process.                                                                        |
|               | Perception        | What one thinks of the process.                                                                               |
|               | Workshops         | Explanation on the process-workshops besides the TSW.                                                         |
| Pre-TSW       | Maps/model        | Technical preparation.                                                                                        |
|               | Meetings/liaison  | Social preparation.                                                                                           |
| TSW           | Activities/tools  | The kind of activities and/or tools used during the TSWs.                                                     |
|               | Countries         | In what counties one was involved in the TSW + role.                                                          |
|               | Experience        | Things that happened during the workshops.                                                                    |
|               | Perception        | What one thinks of the TSWs.                                                                                  |
| Post-TSW      | Feedback          | Feedback/discuss the travel scenario results and model outputs with the participants.                         |
|               | Maps/model        | Performing the accessibility analysis etc.                                                                    |
| Facilitators  | (Road)experts     | Having road experts present during the workshop.                                                              |
|               | Facilitator       | Having a strong/charismatic facilitator.                                                                      |
|               | Feedback/time     | Having enough time to make the travel scenarios and/or show the result of their travel scenario in the model. |
|               | Visualizing       | Using maps/data/models to visualize/explain.                                                                  |
|               | Other             | ...                                                                                                           |
| Barriers      | Participants      | The (variety of) present stakeholders, as well as the number of present stakeholders.                         |
|               | Power             | Power imbalances or social factors.                                                                           |
|               | Reading maps      | Inexperience with reading maps.                                                                               |
|               | Remote            | Remote TSW/GeoHealth members cannot travel into the countries and be lively present at the TSW.               |
|               | Season            | Influence of the dry/wet season on the travel scenario's                                                      |
|               | Time              | Not enough time to come to realistic travel scenario's.                                                       |
|               | Travel speed      | Defining travel speeds (in km/h)                                                                              |
|               | Other             | ...                                                                                                           |
| Opportunities | Feedback          | Discuss/Show the results of the formulated travel scenario(s).                                                |
|               | GPS               | Use GPS trackers or systems.                                                                                  |
|               | Prep-experts      | Discussing objectives, relevance and details with facilitators, incorporating road experts.                   |
|               | Prep-participants | Ask participants to prepare some things for the workshop.                                                     |
|               | Referral          | Use the referral information of travelling between health facilities.                                         |
|               | Travel time       | Let the participants discuss time (between facilities, villages...) instead of speed.                         |
|               | Other             | ...                                                                                                           |
| Other         | Demographics      | Some personal information like age, occupation, career etc.                                                   |

|       |            |                                                                           |
|-------|------------|---------------------------------------------------------------------------|
| Other | Extra      | Things for me to look into, or things to inquire with other interviewees. |
|       | Networking | Info about possible other interviewees.                                   |

### Final Codebook

| Code group   | Code             | Definition                                                                                                                                                                                            |
|--------------|------------------|-------------------------------------------------------------------------------------------------------------------------------------------------------------------------------------------------------|
| Process      | Countries        | In what counties one was involved in the process.                                                                                                                                                     |
|              | Experience       | How one experiences the whole process, including changes/developments and one's own role in it.                                                                                                       |
|              | Perception       | What one thinks of the process.                                                                                                                                                                       |
|              | Workshops        | Explanation on the process-workshops besides the TSW.                                                                                                                                                 |
| Pre-TSW      | Maps/model       | Technical preparation.                                                                                                                                                                                |
|              | Meetings/liaison | Social preparation.                                                                                                                                                                                   |
| TSW          | Activities/tools | The kind of activities and/or tools used during the TSWs.                                                                                                                                             |
|              | Countries        | In what counties one was involved in the TSW + role.                                                                                                                                                  |
|              | Experience       | Things that happened during the workshops.                                                                                                                                                            |
|              | Learning         | Learning experiences from the TSW (for participants/facilitators)                                                                                                                                     |
|              | Participants     | Concerns the (kind of) stakeholders/experts present/involved with the workshop and or results/outputs.                                                                                                |
|              | Perception       | What one thinks of the TSWs.                                                                                                                                                                          |
| Post-TSW     | Feedback         | Feedback/discuss the travel scenario results and model outputs with the participants.                                                                                                                 |
|              | Maps/model       | Performing the accessibility analysis etc.                                                                                                                                                            |
| Facilitators | (Road)experts    | Having road/cartographic/local GIS experts present during the workshop.                                                                                                                               |
|              | Cluster          | Grouping regions with similar characteristics together, so that the travel scenario automatically applies to the entire cluster (as opposed to a different scenario for every single region/district) |
|              | Facilitator      | Having a strong/charismatic facilitator.                                                                                                                                                              |
|              | Feedback/time    | Having enough time to make the travel scenarios and/or show the result of their travel scenario in the model.                                                                                         |
|              | Participatory    | Appreciated that the workshop was very participatory/active contribution                                                                                                                              |
|              | Visualizing      | Using maps/data/models to visualize/explain.                                                                                                                                                          |
|              | Other            | ....                                                                                                                                                                                                  |
| Barriers     | Facilitator      | Having a sub-optimal facilitator.                                                                                                                                                                     |
|              | Participants     | The (variety of) present stakeholders, as well as the number of present stakeholders.                                                                                                                 |

| Code group    | Code              | Definition                                                                                                                                            |
|---------------|-------------------|-------------------------------------------------------------------------------------------------------------------------------------------------------|
| Barriers      | Power             | Power imbalances or social factors, often in relation to reaching consensus.                                                                          |
|               | Purpose           | Understanding the objective/utility of the workshop                                                                                                   |
|               | Reading maps      | Inexperience with reading maps.                                                                                                                       |
|               | Remote            | Remote TSW/GeoHealth members cannot travel into the countries and be lively present at the TSW (as a result of COVID).                                |
|               | Season            | Influence of the dry/wet season on the travel scenario's                                                                                              |
|               | Time              | Not enough time to come to realistic travel scenario's.                                                                                               |
|               | Travel speed      | Defining travel speeds (in km/h) in relation to different modes of transport.                                                                         |
|               | Other             | ....                                                                                                                                                  |
| Opportunities | Feedback          | Discuss/Show the results of the formulated travel scenario(s) for (cross) validation.                                                                 |
|               | GPS               | Use GPS trackers or systems.                                                                                                                          |
|               | Photo             | Use of pictures to visualize the roads (considering nomenclature can be very different in every country.                                              |
|               | Predefined        | Show/use predefined travel speeds/travel scenarios.                                                                                                   |
|               | Prep-experts      | Discussing objectives, relevance and details with facilitators, incorporating road experts.                                                           |
|               | Prep-participants | Ask participants to prepare some things for the workshop.                                                                                             |
|               | Referral          | Use the referral information of travelling between health facilities.                                                                                 |
|               | Time              | Having more time to do the workshop                                                                                                                   |
|               | Travel time       | Let the participants discuss time (between facilities, villages...) instead of speed.                                                                 |
|               | Other             | ...                                                                                                                                                   |
| Other         | Demographics      | Some personal information like age, occupation, career etc. (For In-depth interviews: their roles regarding the TSW are also coded with demographics) |
|               | Extra             | Things for me to look into, or things to inquire with other interviewees.                                                                             |
|               | Networking        | Info about possible other interviewees.                                                                                                               |
